# Supplementary material
Source: PubMed Central journal article supplement (PMC2673912)

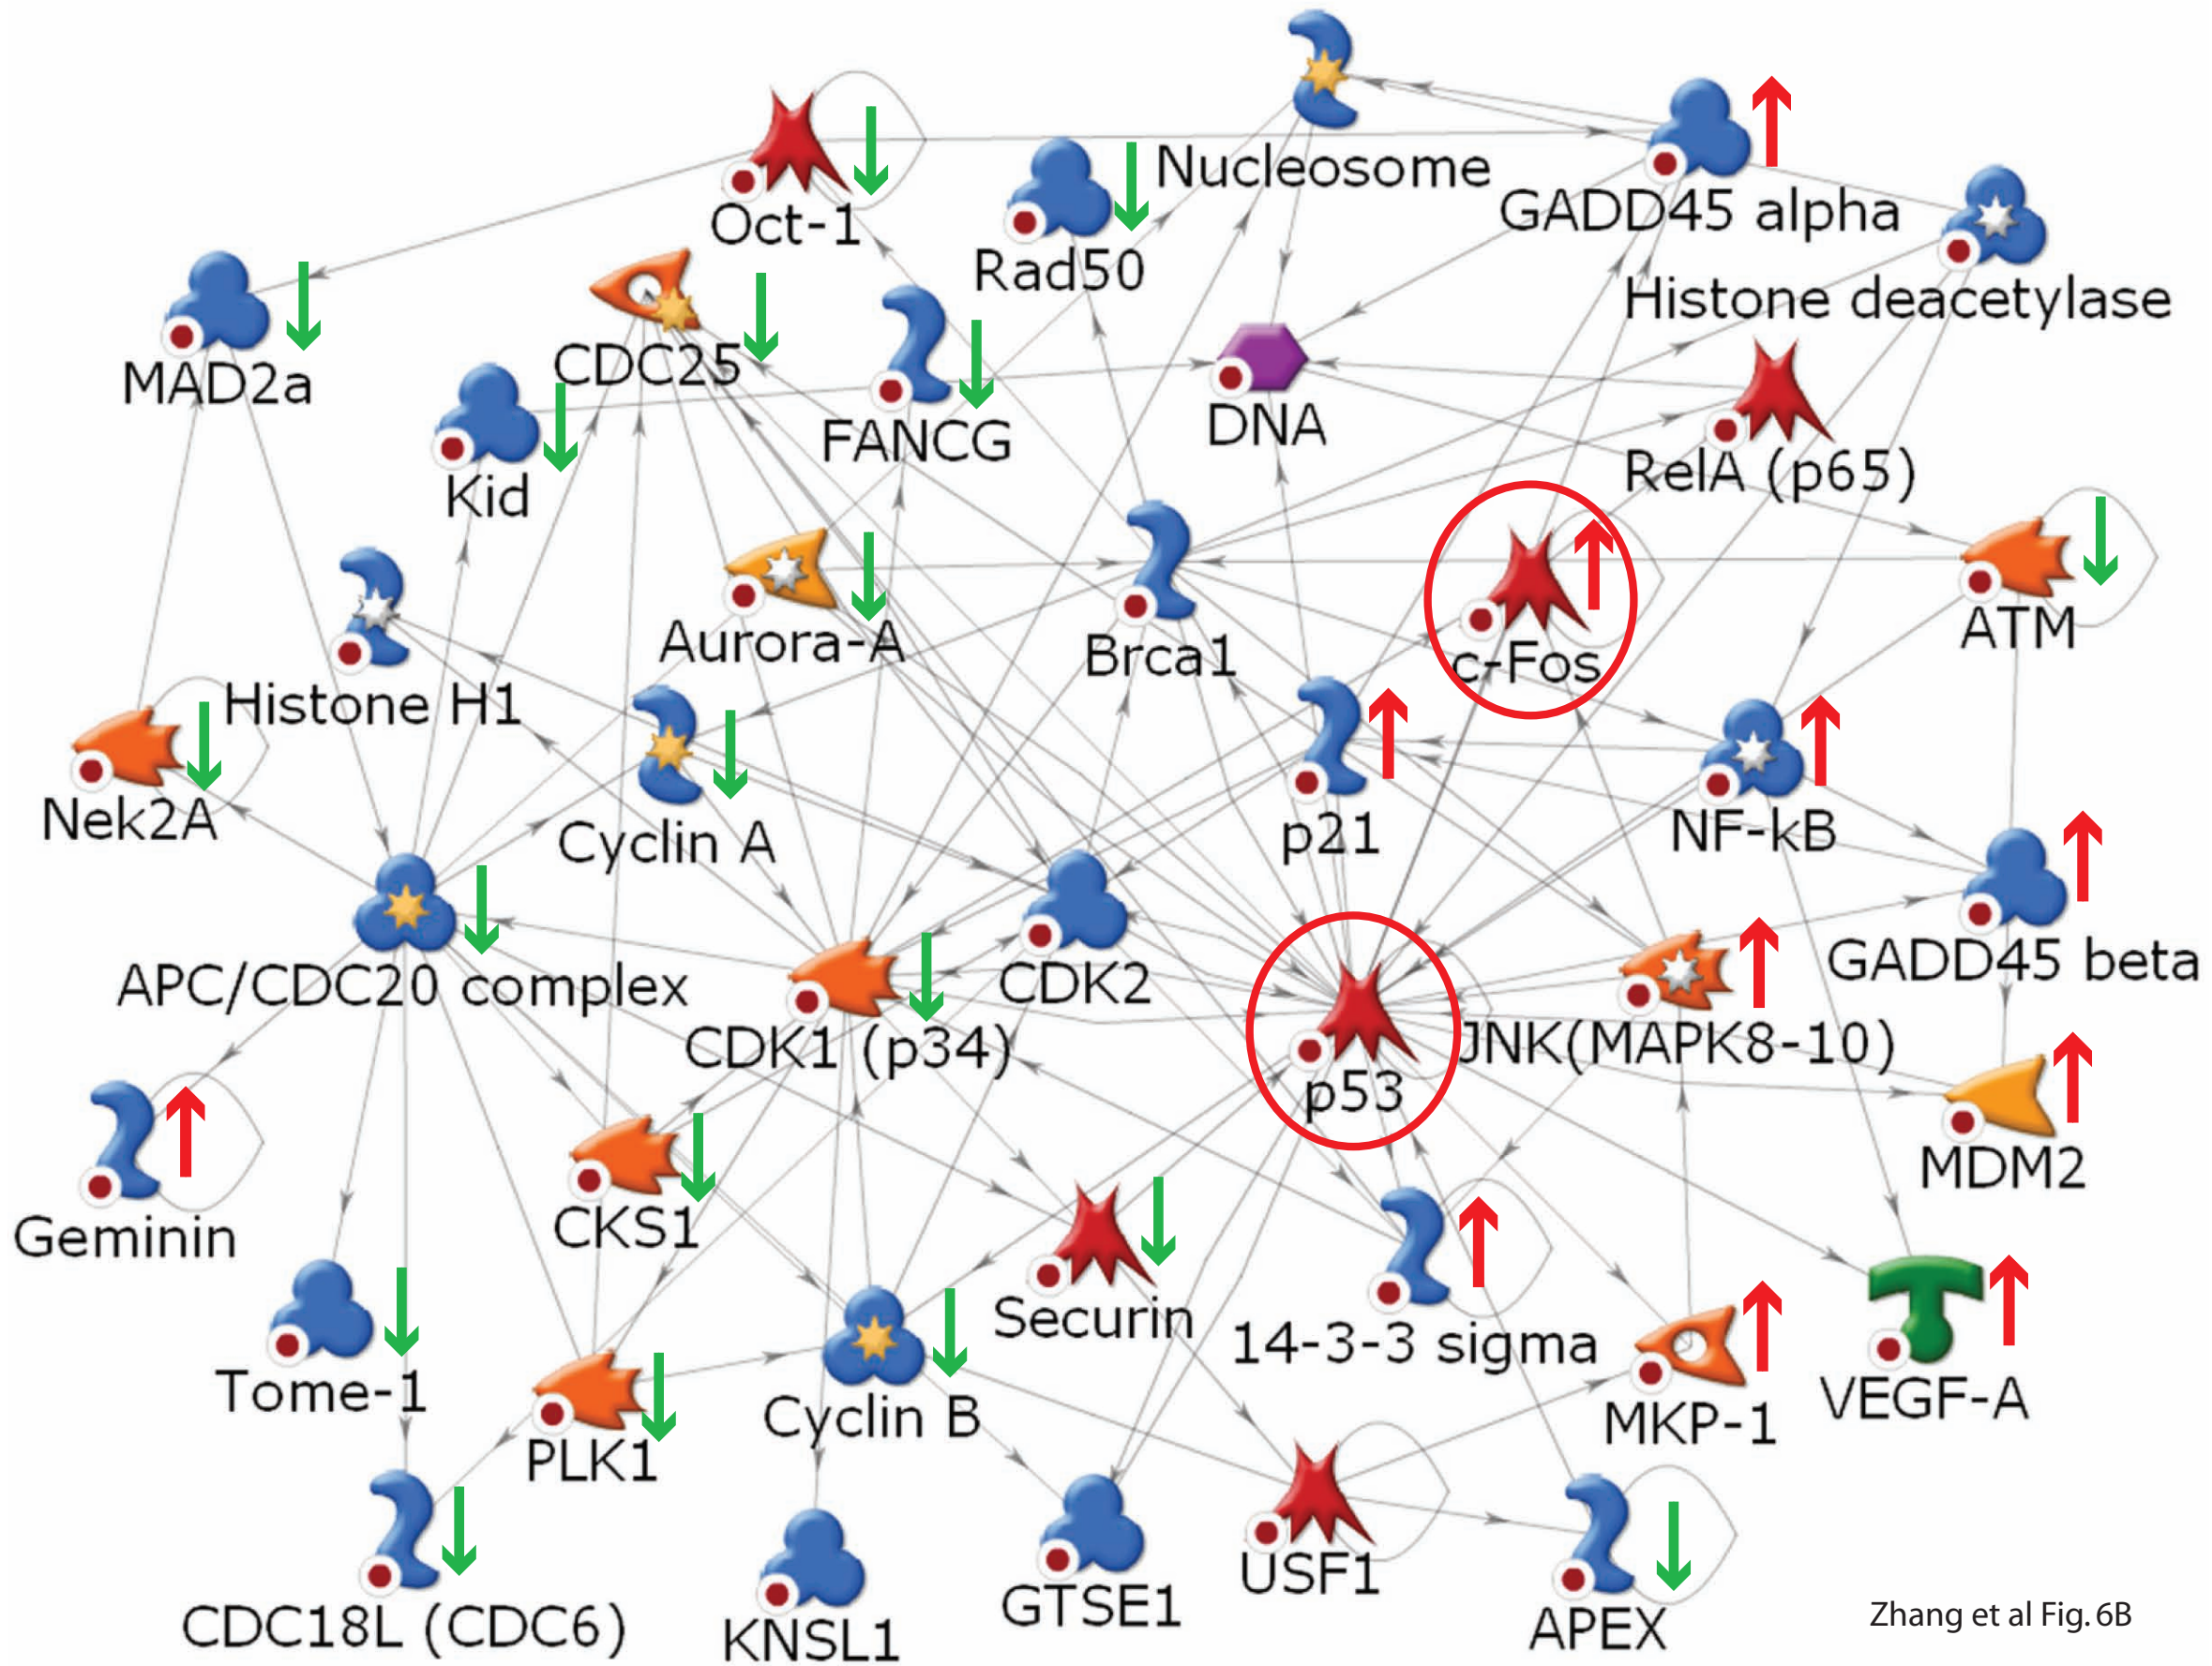

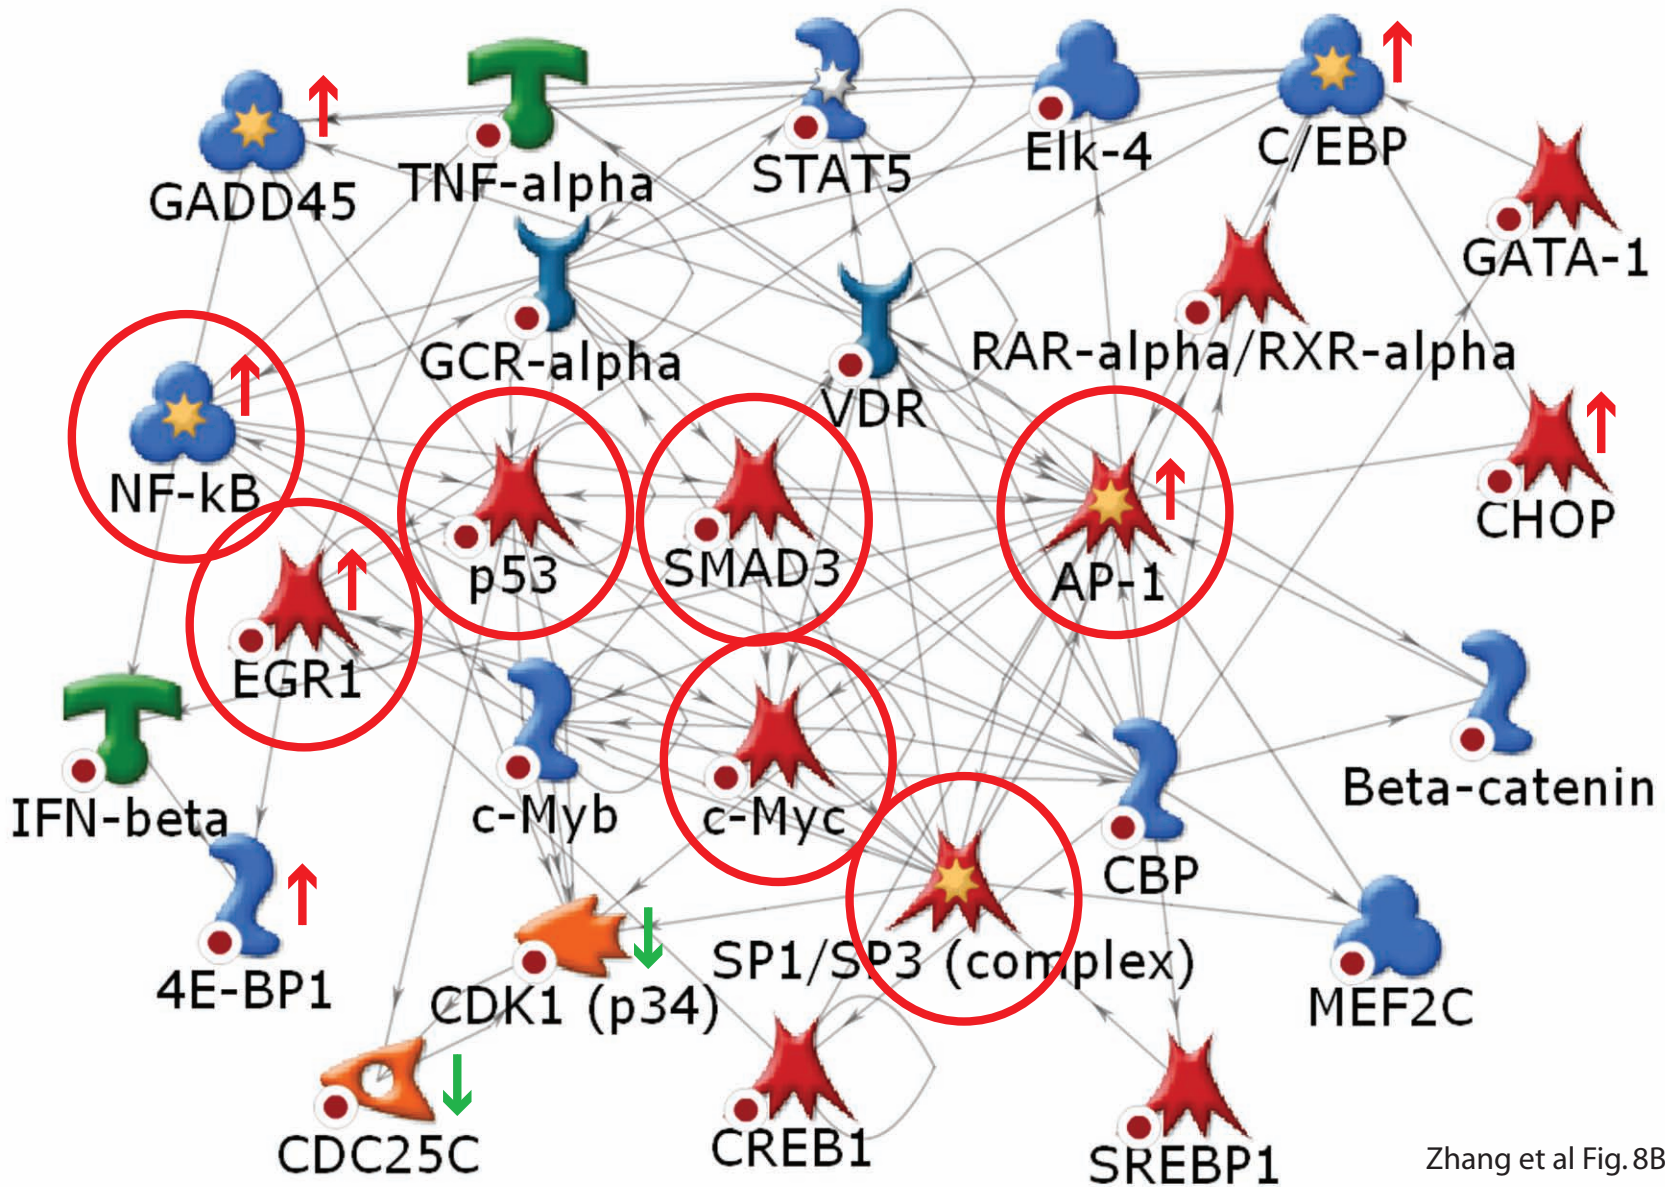



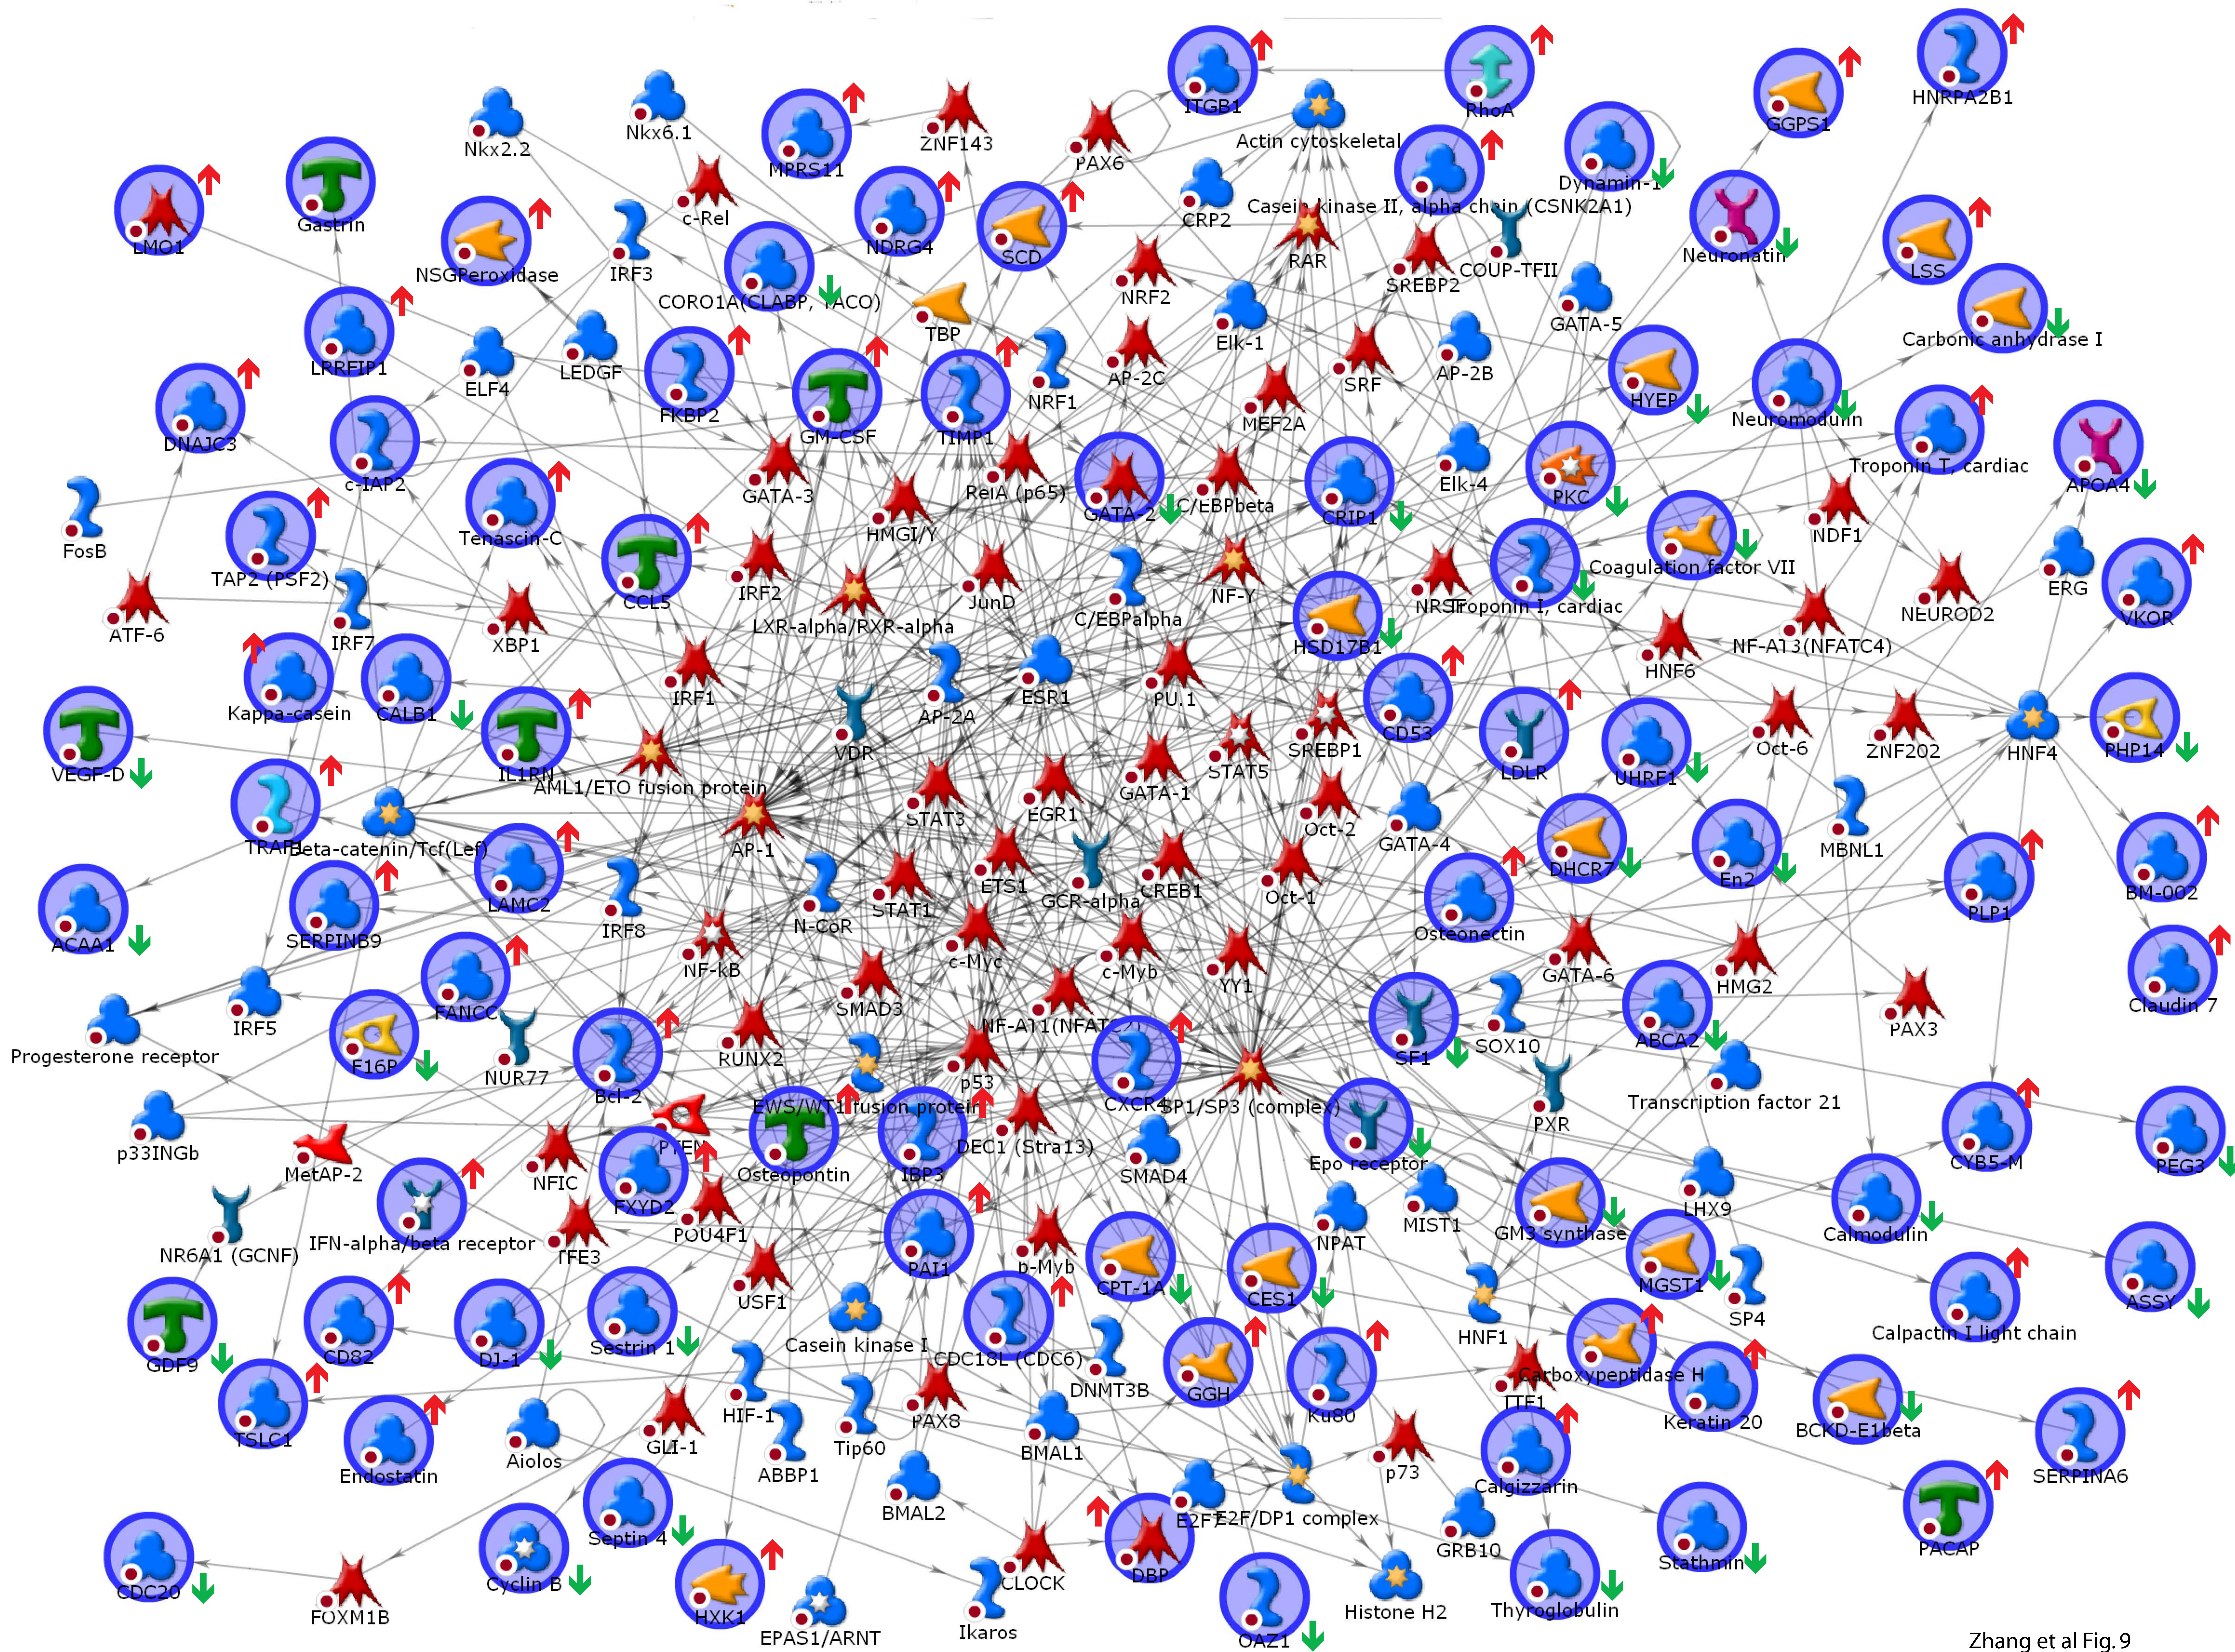

Zhang et al Fig. 9



Fig.9 Network Statistics: 278 nodes,783 edges

Top 25 transcription factors from differential network

|    | Name                | Total Edges | Edges In | Edges Out |
|----|---------------------|-------------|----------|-----------|
| 1  | SP1/SP3             | 63          | 14       | 49        |
| 2  | AP-1                | 52          | 27       | 25        |
| 3  | p53                 | 41          | 20       | 21        |
| 4  | c-Myc               | 35          | 23       | 12        |
| 5  | STAT3               | 24          | 12       | 12        |
| 6  | NF-kB               | 20          | 4        | 16        |
| 7  | c-Jun               | 20          | 10       | 10        |
| 8  | STAT1               | 19          | 11       | 8         |
| 9  | YY1                 | 19          | 3        | 16        |
| 10 | LXR-alpha/RXR-alpha | 17          | 5        | 12        |
| 11 | EGR1                | 16          | 9        | 7         |
| 12 | PU.1                | 16          | 9        | 7         |
| 13 | SMAD3               | 16          | 10       | 6         |
| 14 | Oct-1               | 14          | 6        | 8         |
| 15 | RUNX2               | 14          | 7        | 7         |
| 16 | STAT5               | 14          | 5        | 9         |
| 17 | c-Fos               | 14          | 8        | 6         |
| 18 | SP1                 | 14          | 4        | 10        |
| 19 | DEC1                | 13          | 7        | 6         |
| 20 | ETS1                | 13          | 7        | 6         |
| 21 | GATA-1              | 13          | 4        | 9         |
| 22 | RelA                | 13          | 7        | 6         |
| 23 | AML1/ETO            | 12          | 1        | 11        |
| 24 | c-Myb               | 12          | 8        | 4         |
| 25 | C/EBPbeta           | 12          | 6        | 6         |

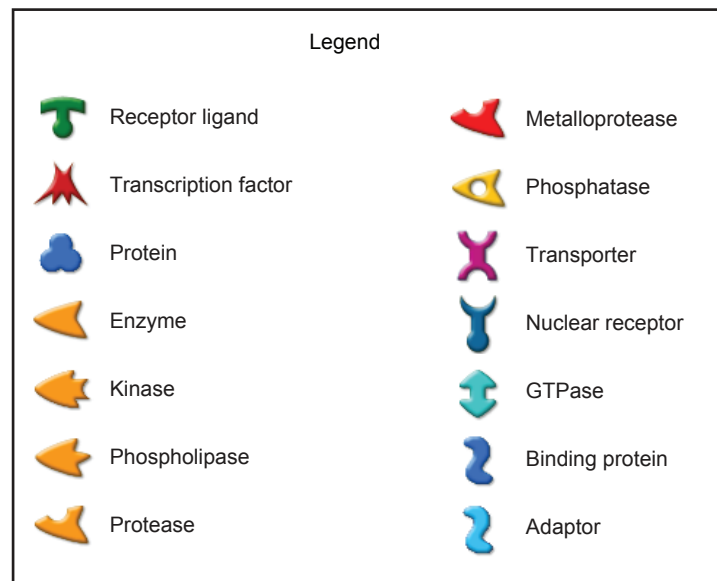

Supplement: NIHMS97237-supplement-Suplemetary_Ne.pdf [file NIHMS97237-supplement-Suplemetary_Ne.pdf]
